# Supplementary material for: High energy and high voltage integrated photo-electrochemical double layer capacitor
Source: Royal Society of Chemistry journal article supplement (doi:10.1039/c8se00003d), 2018-01-01
Supplement: c8se00003d2.pdf [file c8se00003d2.pdf]

## Supporting information

### High energy and high voltage integrated photo-electrochemical double layer capacitor

*Alberto Scalia<sup>1,2,3</sup>, Alberto Varzi<sup>1,2,\*</sup>, Andrea Lamberti<sup>3</sup>, Elena Tresso<sup>3</sup>, Sangsik Jeong<sup>1,2</sup>, Timo Jacob<sup>1,4</sup>, Stefano Passerini<sup>1,2,\*</sup>.*

Back-illuminated glass

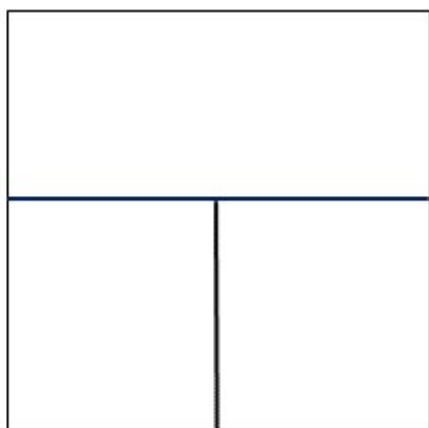

Front illuminated glass

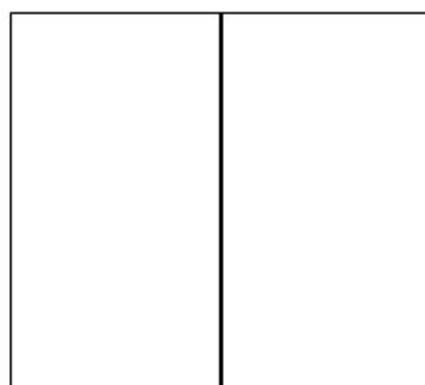

**Figure 1S:** Back and front DSSC glass after proper cutting FTO layer.

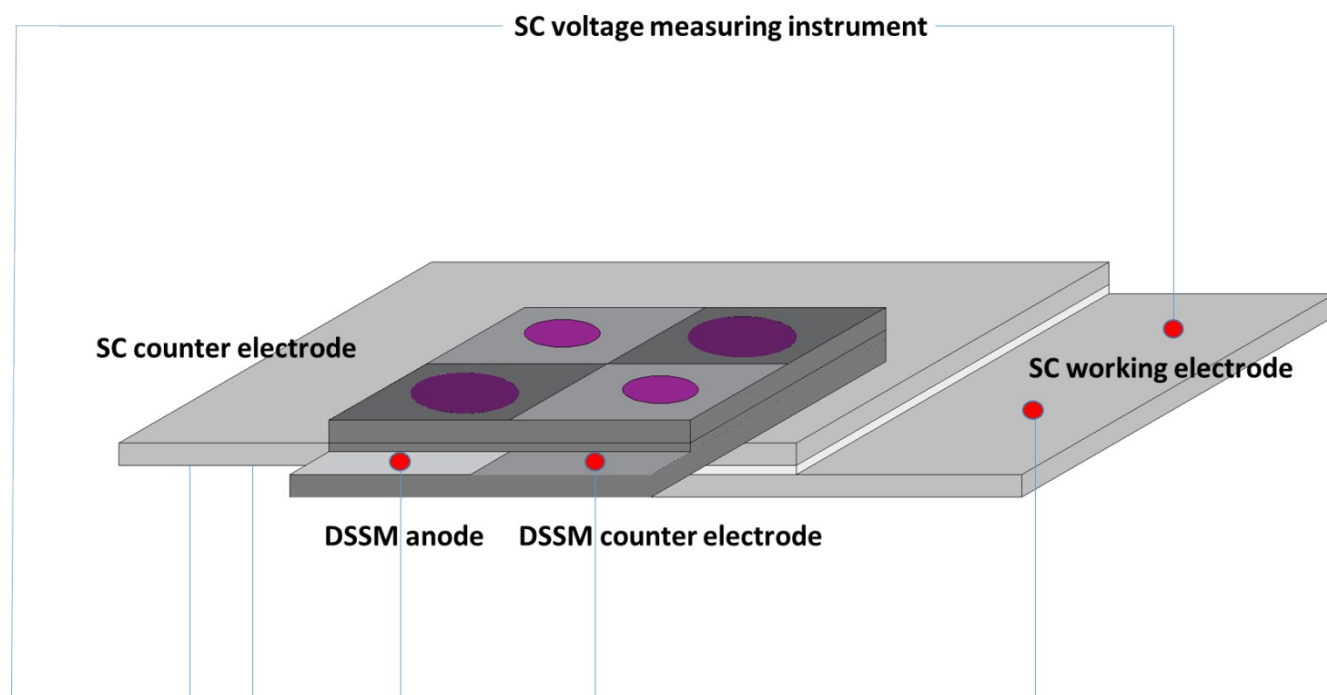

**Figure 2S:** Electrodes connection between DSSC and SC during photo-charge.

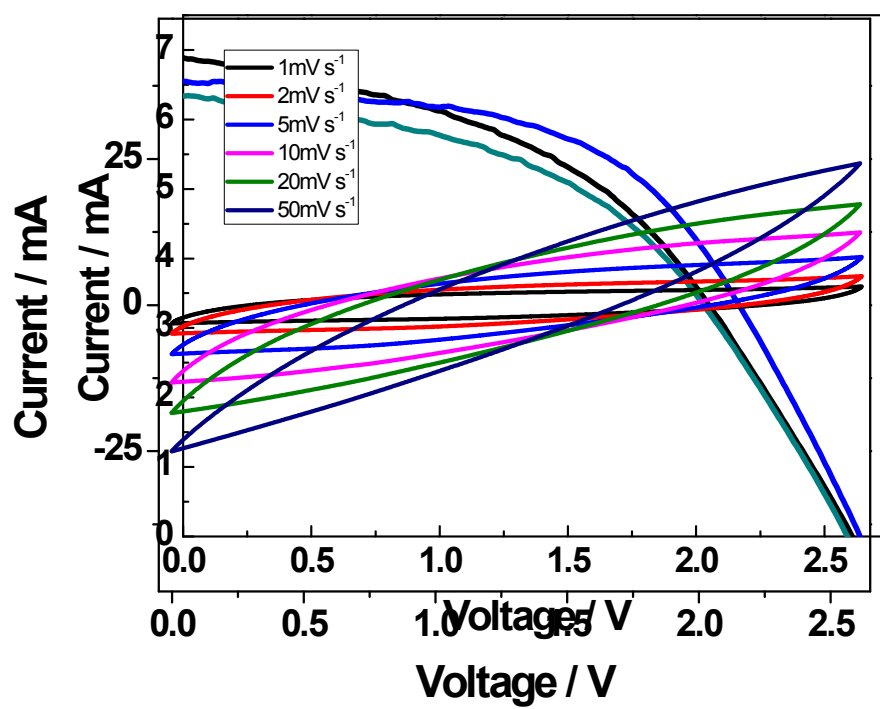

**Figure 3S:** CV curves of the SC section recorded for different scan rate.

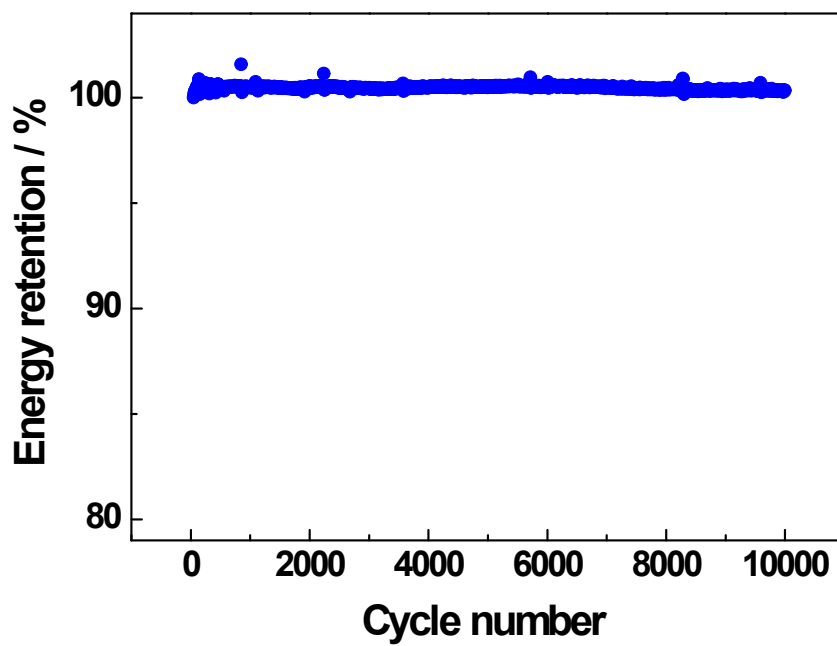

**Figure 4S:** Energy retention as function of the cycle number

**Figure 5S:** IV curves of three different DSSMs testifying the results' reproducibility.

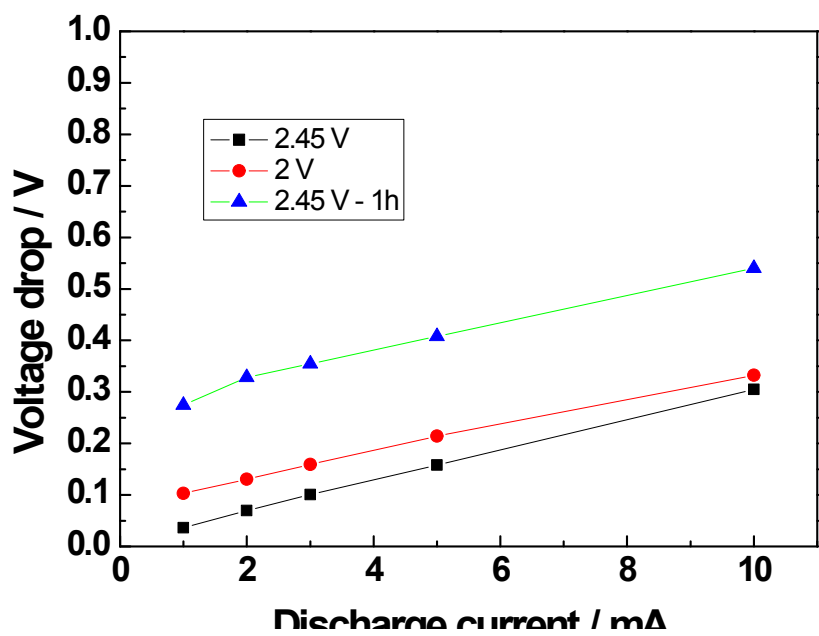

**Figure 6S:** Voltage drop of the SC section after switching from photo-charge to discharge.
